# Supplementary material for: Solution processing of air-stable molecular semiconducting iodosalts, Cs2SnI6−xBrx, for potential solar cell applications
Source: Royal Society of Chemistry journal article supplement (doi:10.1039/c7se00100b), 2017-01-01
Supplement: c7se00100b1.pdf [file c7se00100b1.pdf]

## Supporting Information

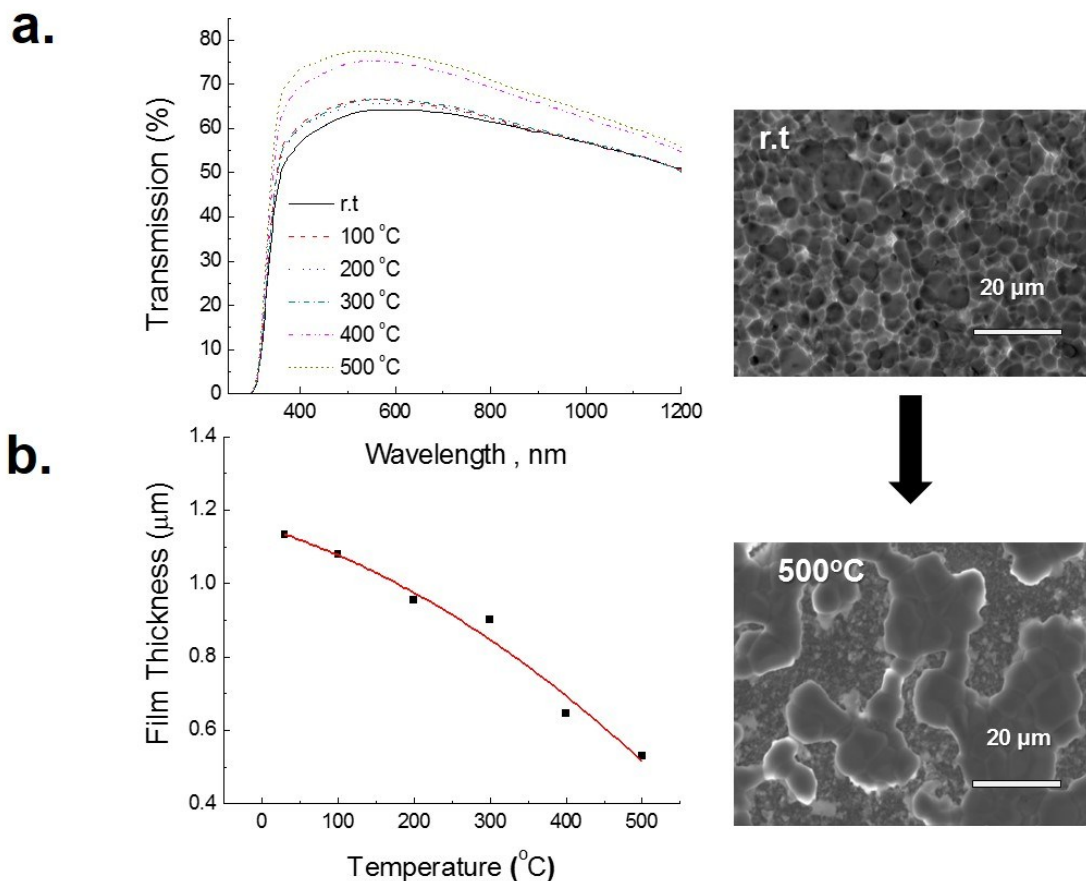

**Supporting Information 1. a.** Transmission graph (The inset shows the coverage of CsI film by SEM at low and high temperatures) **b.** Plot of the film thickness of CsI film as a function of temperature

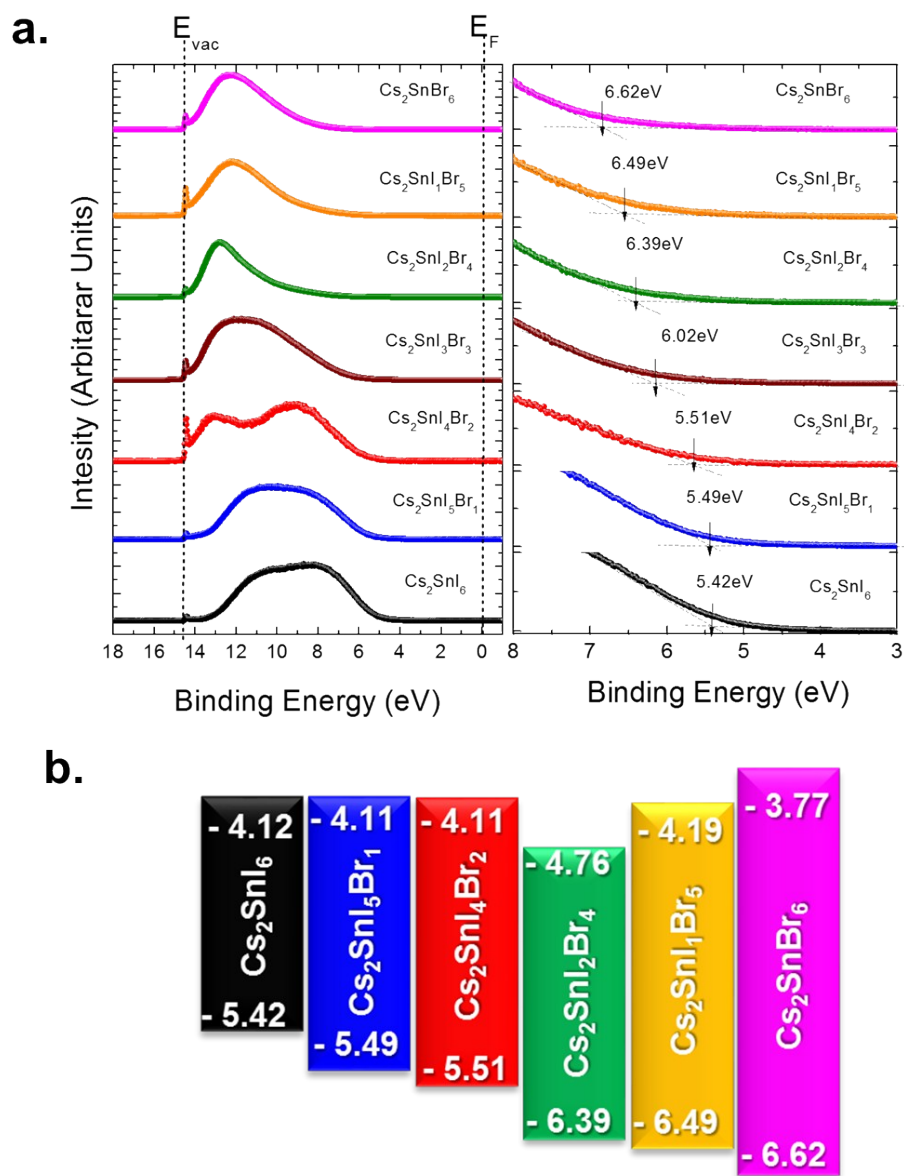

**Supporting Information 2. Characteristics of the different composition of  $\text{Cs}_2\text{SnI}_{6-x}\text{Br}_x$ :** **a.** UPS analysis of various  $\text{Cs}_2\text{SnI}_{6-x}\text{Br}_x$  compositions prepared by Two-Step solution process **b.** the corresponding energy diagram

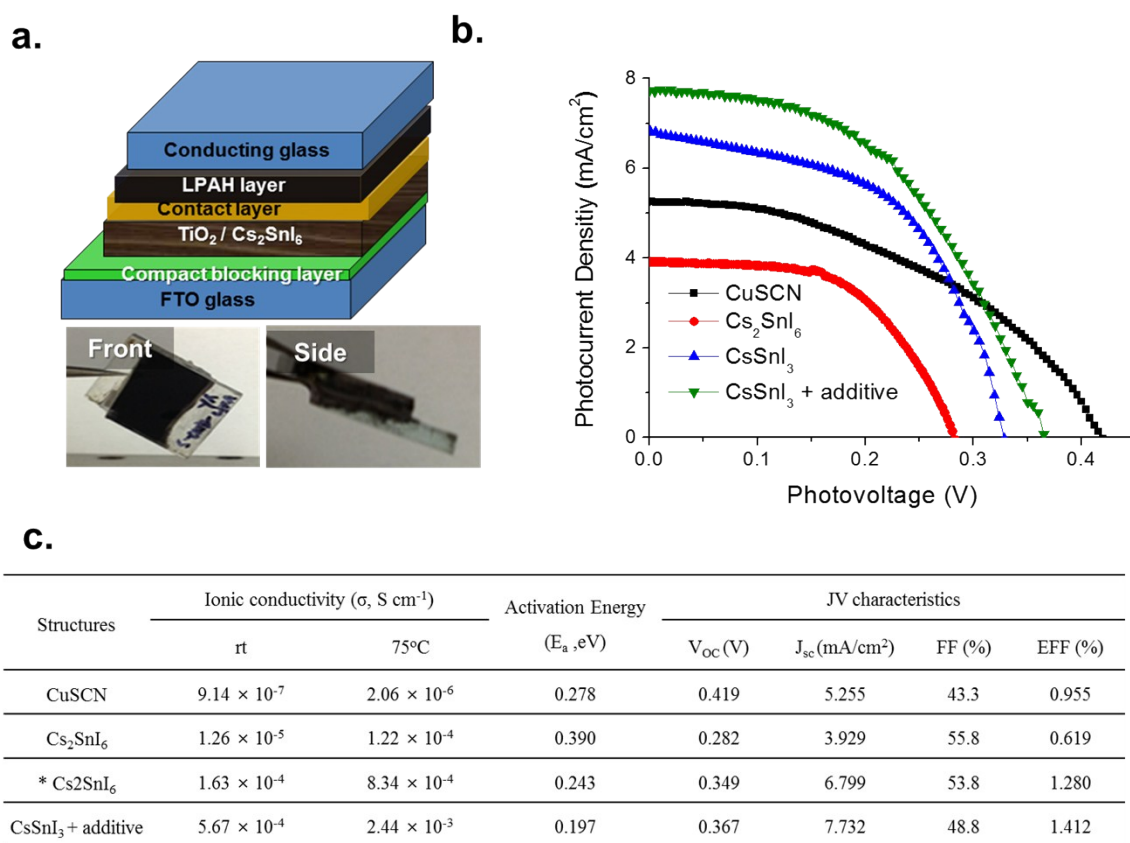

**Supporting Information 3. Ionic conductivity and Solar cell properties of the different solid state ionic conductors as HTM layers** **a.** the cell configuration of a sandwich typed device (top and side) and photo images for the real device **b.** JV characteristic of the Cs<sub>2</sub>SnI<sub>6</sub> film using the different mixture of blend **c.** table summarizing ionic conductivity, activation energy, and solar cell performance

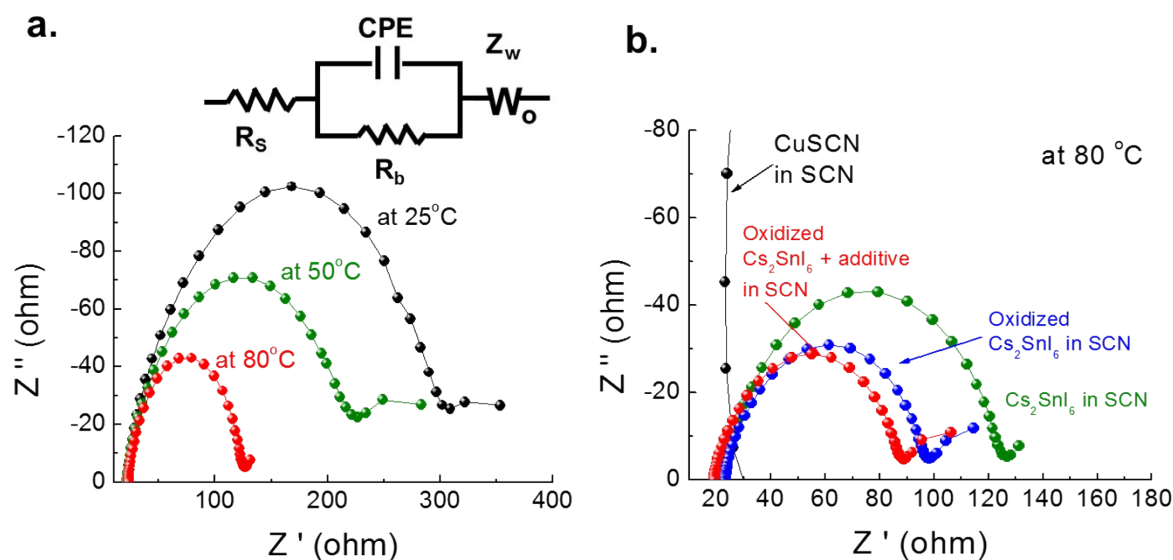

**Supporting Information 4. Electrical properties of the different solid state ionic conductor as a HTM layer**

**a.** 10wt%  $Cs_2SnI_6$  in SCN at different temperatures, and the equivalent circuit. In the equivalent circuit,  $R_b$  is the bulk resistance of the solid state electrolytes and CPE is the constant phase element to fit bulk capacitance. The straight line at the lower frequencies is due to an ion diffusion-limited process contributing to an impedance response (Warburg impedance  $Z_w$ )

**b.** Experimental and fitted impedance spectra at 80°C

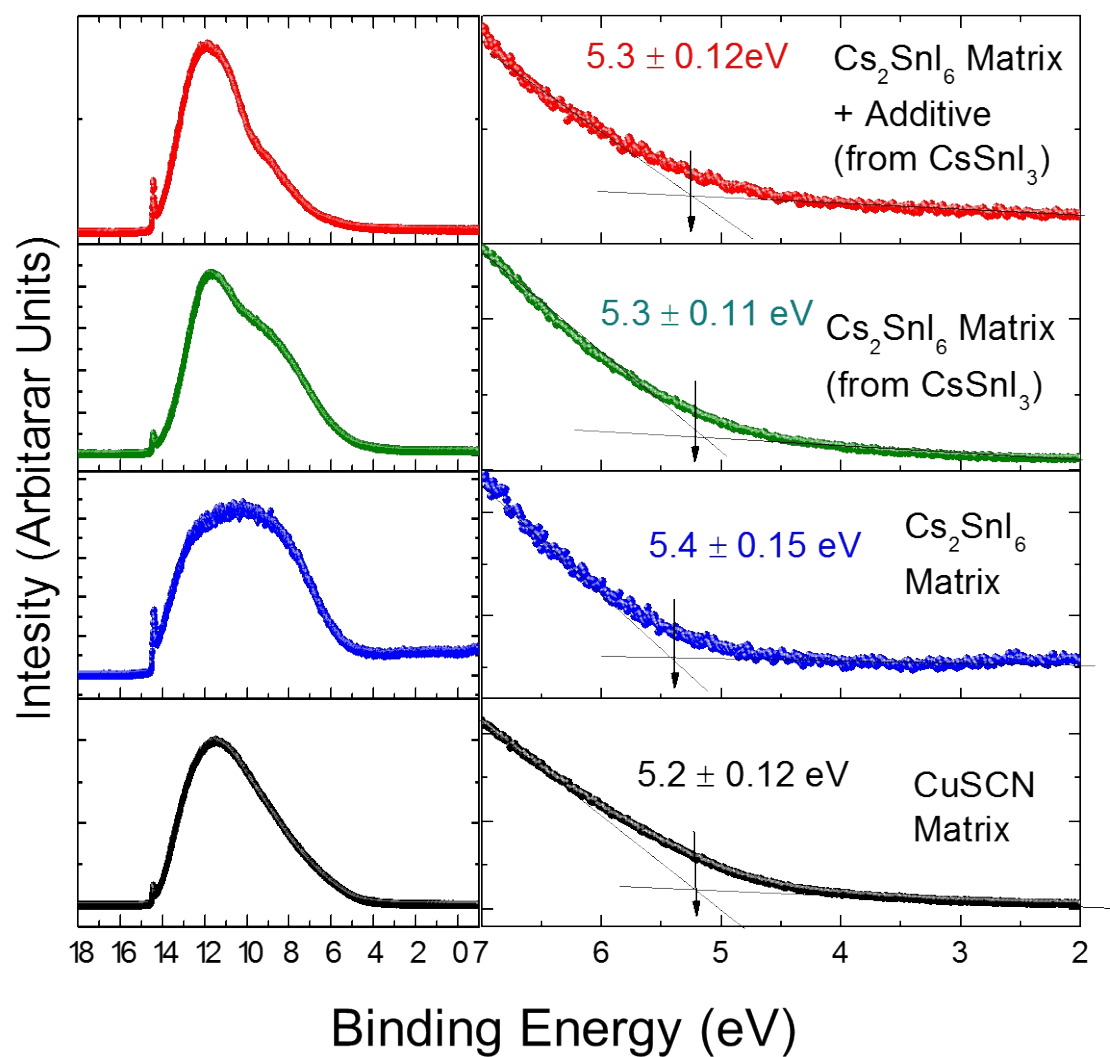

**Supporting Information 5.** UPS analysis of the different solid state ionic conductor as a HTM layer

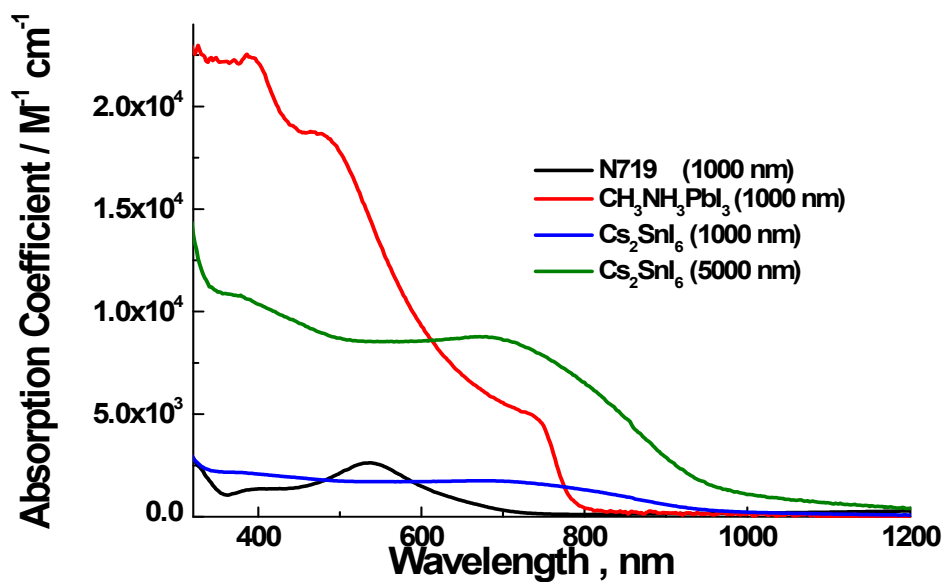

|                                      | Thickness (nm) | $E_g$ (eV) | Absorption coefficient ( $\alpha$ , $\text{cm}^{-1}$ ) |                     |
|--------------------------------------|----------------|------------|--------------------------------------------------------|---------------------|
|                                      |                |            | at 550nm                                               | at 680nm            |
| N719                                 |                | 2.32       | $2.52 \times 10^3$                                     | $0.484 \times 10^3$ |
| $\text{CH}_3\text{NH}_3\text{PbI}_3$ | $\sim 400$     | 1.5        | $1.32 \times 10^4$                                     | $6.01 \times 10^3$  |
|                                      | $\sim 1000$    |            | $1.5 \times 10^4$                                      | $5.0 \times 10^3$   |
| $\text{Cs}_2\text{SnI}_6$            | $\sim 1000$    | 1.3        | $1.70 \times 10^3$                                     | $1.75 \times 10^3$  |
|                                      | $\sim 5000$    |            | $8.5 \times 10^3$                                      | $8.77 \times 10^3$  |

**Supporting Information 6.** Absorption properties of the different sensitizer materials

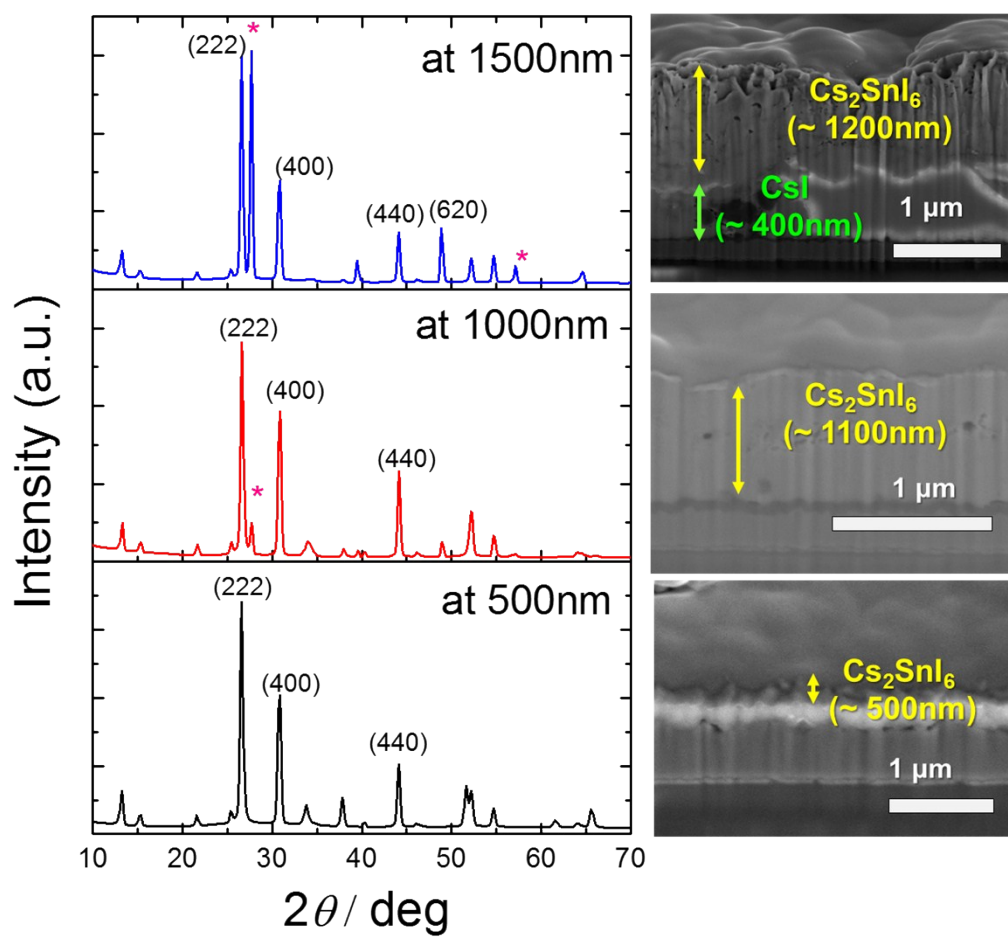

**Supporting Information 7.** XRD analysis for the different film thickness and morphological study from SEM and TEM analysis for
